# Supplementary material for: Is Health Education among the Decisive Factors for the Diet Quality of Pregnant Women in Poland?
Source: MDPI journal article supplement (doi:10.3390/nu15112627), 2023-06-04
Supplement: s1 [file s1]

**Table S1.** Dietary characteristics of surveyed women

|                | 1    | 2    | 3    | 4    | 5    | 6    | 7    | 8    | 9    | 10   |
|----------------|------|------|------|------|------|------|------|------|------|------|
| <b>TOTAL</b>   |      |      |      |      |      |      |      |      |      |      |
| Median         | 0.14 | 0.14 | 0.50 | 0.50 | 0.14 | 0.50 | 0.06 | 0.06 | 1.00 | 1.00 |
| Q <sub>1</sub> | 0.06 | 0.06 | 0.14 | 0.14 | 0.06 | 0.14 | 0.06 | 0.06 | 0.50 | 0.50 |
| Q <sub>3</sub> | 0.50 | 0.50 | 1.00 | 0.50 | 0.50 | 0.50 | 0.14 | 0.14 | 2.00 | 2.00 |
| <b>HEG</b>     |      |      |      |      |      |      |      |      |      |      |
| Median         | 0.50 | 0.14 | 0.50 | 0.50 | 0.50 | 0.50 | 0.14 | 0.06 | 1.00 | 1.00 |
| Q <sub>1</sub> | 0.06 | 0.06 | 0.14 | 0.14 | 0.06 | 0.14 | 0.06 | 0.06 | 0.50 | 0.50 |
| Q <sub>3</sub> | 0.50 | 0.50 | 1.00 | 0.50 | 0.50 | 0.50 | 0.14 | 0.14 | 2.00 | 2.00 |
| <b>nHEG</b>    |      |      |      |      |      |      |      |      |      |      |
| Median         | 0.06 | 0.06 | 0.50 | 0.50 | 0.14 | 0.50 | 0.06 | 0.06 | 0.50 | 0.50 |
| Q <sub>1</sub> | 0.00 | 0.00 | 0.14 | 0.14 | 0.06 | 0.14 | 0.06 | 0.00 | 0.50 | 0.50 |
| Q <sub>3</sub> | 0.50 | 0.50 | 1.00 | 0.50 | 0.50 | 0.50 | 0.14 | 0.06 | 1.00 | 2.00 |

HEG - group of women with health education, nHEG - group of women without health education  
 1. wholemeal bread; 2. grains and coarse-ground groats; 3. milk; 4. fermented milk beverages; 5. curd;  
 6. white meat; 7. fish; 8. legumes; 9. fruits; 10. vegetables

0.00 – never; 0.06 – 1-3 times a month; 0.14 – once a week; 0.50 – a few times a week; 1 – once a day;  
 2 – a few times a day
